# Supplementary material
Source: Springer Nature journal article supplement (https://www.springermedizin.de/resource/supplementary/12974_2010_357_MOESM8_ESM.pdf/9601482)
Supplement: MOESM8 [file 9601482]

A)

|                   |   |   |     |     |
|-------------------|---|---|-----|-----|
| CoMCont           | + | - | -   | -   |
| CoMTb             | - | + | +   | +   |
| Cas 8 inh $\mu$ M | - | - | 0.1 | 1.0 |

Caspase 8

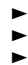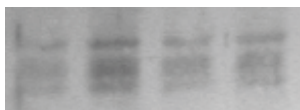

B)

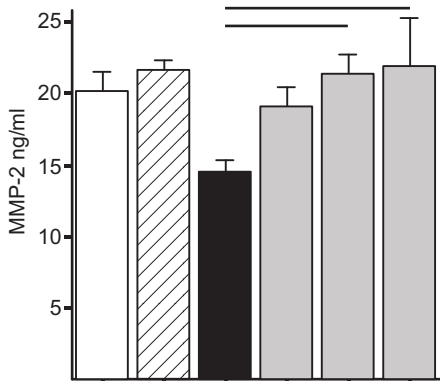

|                       |   |   |   |      |     |   |
|-----------------------|---|---|---|------|-----|---|
| CoMCont               | - | + | - | -    | -   | - |
| CoMTb                 | - | - | + | +    | +   | + |
| Caspase 8 inh $\mu$ M | - | - | - | 0.01 | 0.1 | 1 |

MMP-2

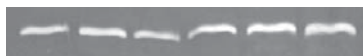

C)

|                   |   |   |     |     |
|-------------------|---|---|-----|-----|
| CoMCont           | + | - | -   | -   |
| CoMTb             | - | + | +   | +   |
| Cas 8 inh $\mu$ M | - | - | 0.1 | 1.0 |

phospho-p38

total-p38

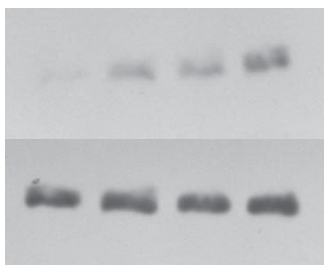

D)

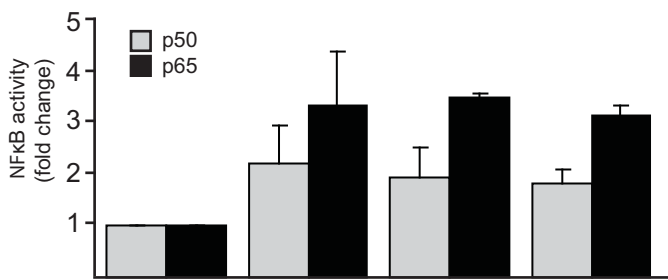

|                   |   |   |   |   |     |     |   |   |   |
|-------------------|---|---|---|---|-----|-----|---|---|---|
| CoMCont           | + | + | - | - | -   | -   | - | - | - |
| CoMTb             | - | - | + | + | +   | +   | + | + | + |
| Cas 8 inh $\mu$ M | - | - | - | - | 0.1 | 0.1 | 1 | 1 | 1 |
